# Supplementary material for: A comprehensive study of the genomic differentiation between temperate Dent and Flint maize
Source: PubMed Central journal article supplement (PMC4937532; doi:10.1186/s13059-016-1009-x), 2016-07-08
Supplement: 13059_2016_1009_MOESM1_ESM.pdf [file 13059_2016_1009_MOESM1_ESM.pdf]

**Supplementary Figures**

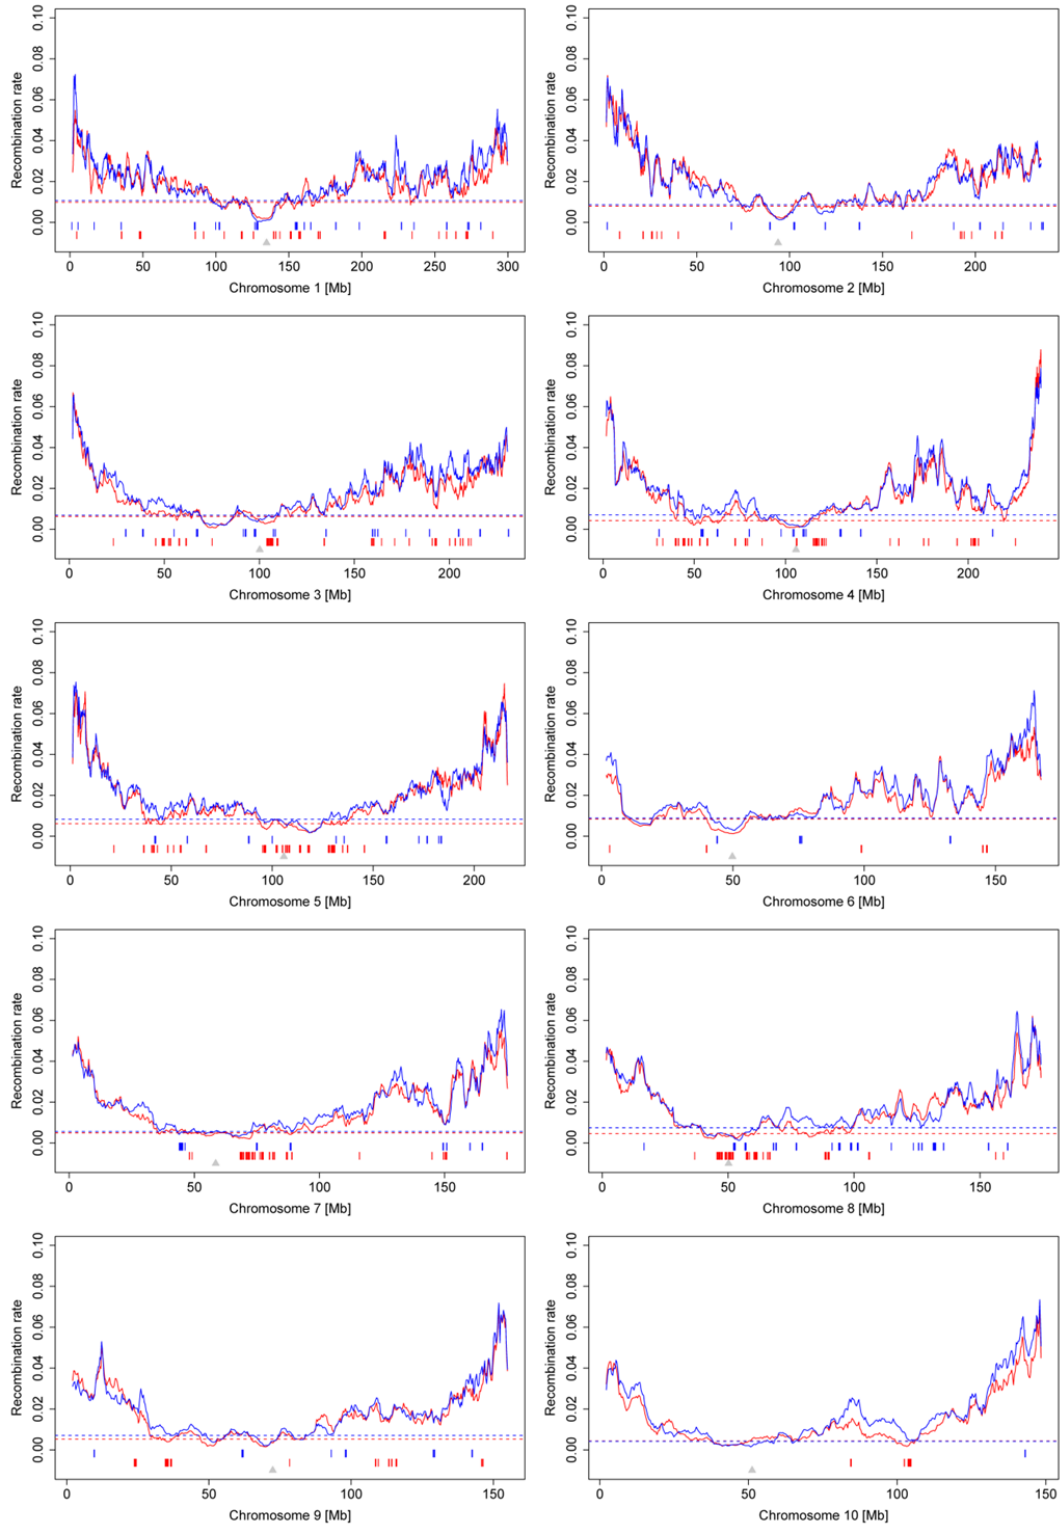

**Figure S2: Variation of historical recombination rates along the ten maize chromosomes.**

Minimal number of recombination events observed per Megabase (Mb) in 70 Dent (red) and 66 Flint lines (blue) based on genotyping data. The position of candidate genes is highlighted in the corresponding colors; dashed lines indicate the 10% quantile of recombination events per Mb for Dent (red) and Flint (blue) and grey triangles indicate the position of centromeres.

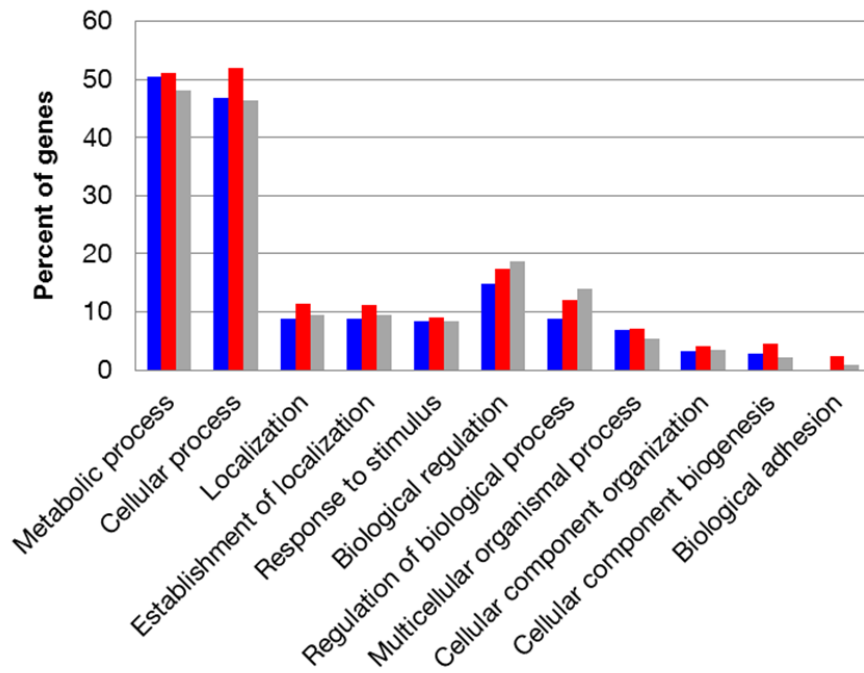

**Figure S3: Gene ontology (GO) terms assigned to categories of biological processes for the candidate gene sets.** GO terms were available for 333 Dent candidates (red) and 214 Flint candidate genes (blue) compared to the background (N = 25,288; grey).

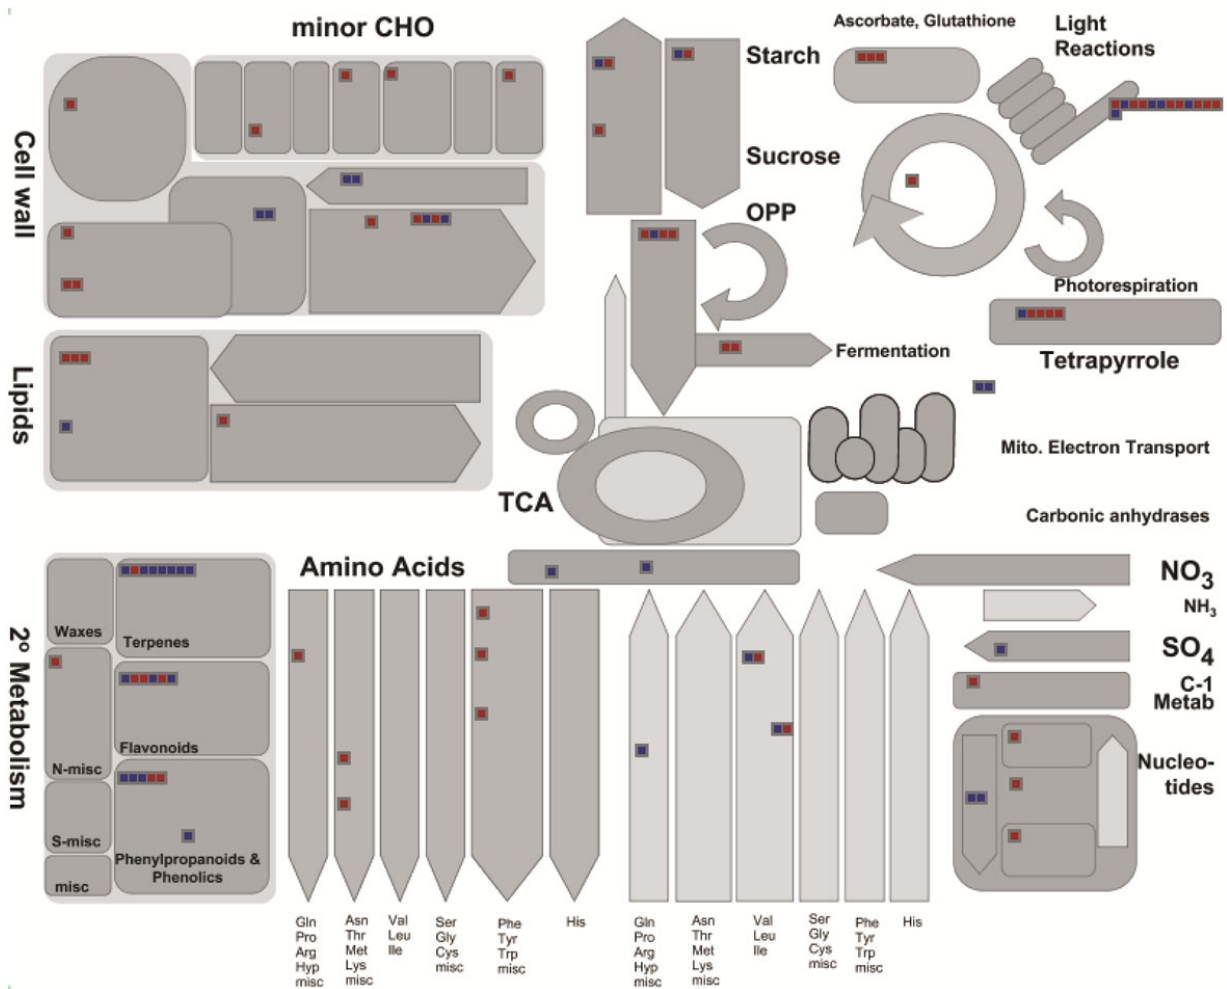

**Figure S4: Pathway analysis for the Dent and Flint candidate gene sets using MapMan [53].** Pathway assignments were available for 58 genes for Dent (red squares) and 40 candidate genes for Flint (blue squares) based on the first transcript per gene. For visualization, values of -4.5 and 4.5 were assigned to Dent and Flint candidate gene transcripts, respectively.

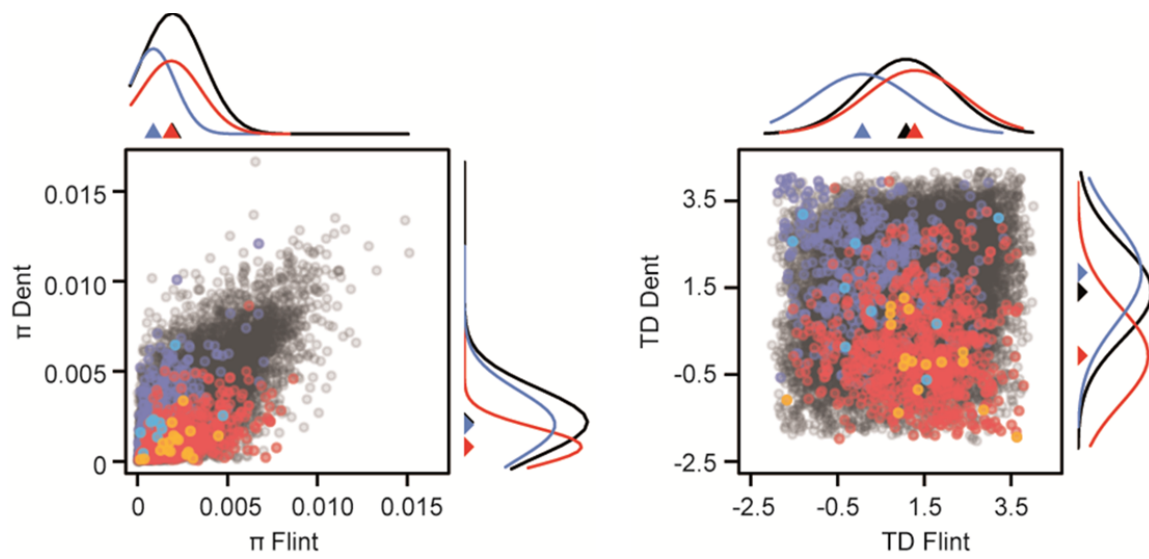

**Figure S5: Gene-wise  $\pi$  (left) and TD (right) values based on whole-genome sequence data of 21 temperate Dent and 19 temperate Flint lines.** Values for all genes are shown in black, selection candidates are highlighted in red (Dent) and blue (Flint). Candidates associated with the flowering network are labelled in orange (Dent) and light blue (Flint). The relative distribution of values is shown by density plots with means indicated by triangles of the corresponding colour.

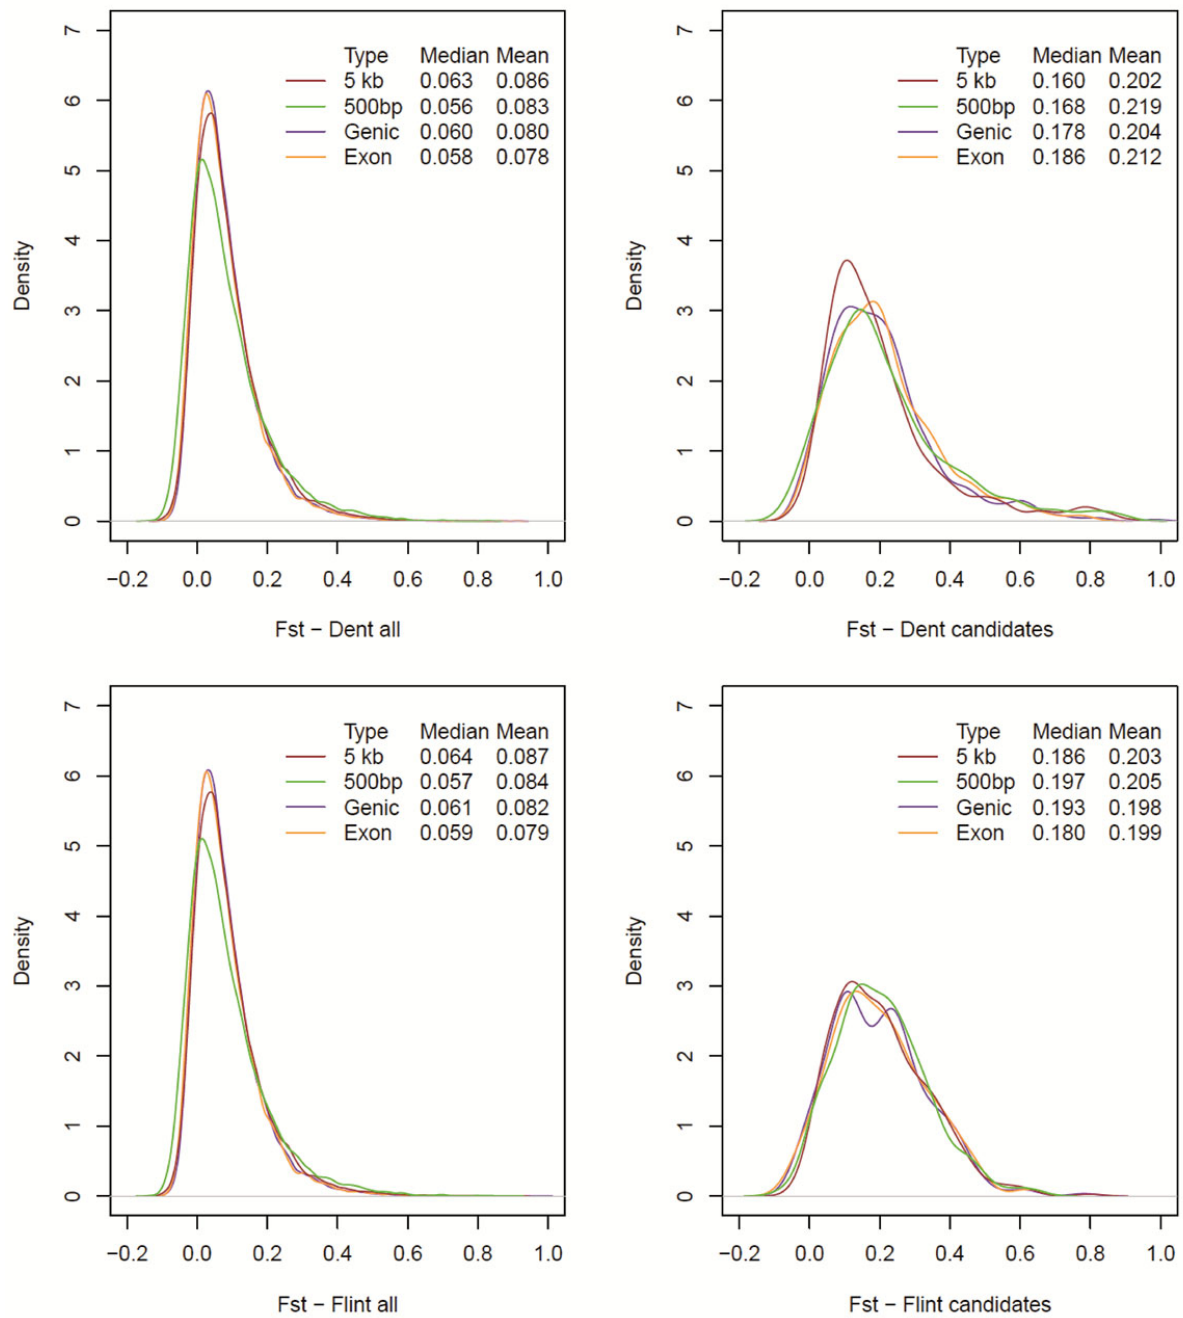

**Figure S6: Distributions of  $F_{ST}$  values for different genomic regions based on whole-genome sequence data of 40 elite lines.** Distributions for 5 kb and 500 bp upstream, genic and exonic regions are shown for all genes except candidate genes on the left and for candidate genes on the right.  $F_{ST}$  values in 21 Dent lines are shown in the upper part and values in 19 Flint lines in the lower part. Details are given in **Table S4**.

## Supplementary Tables

**Table S1:** Elite lines under study with germplasm pool assignment and data source.

| Pool   | Name   | Genotyped with the 600 k array | Whole-genome sequence data     |
|--------|--------|--------------------------------|--------------------------------|
| Dent   | A632   | Yes                            |                                |
|        | B14    | Yes                            |                                |
|        | B37    | Yes                            |                                |
|        | B73    | Yes                            | Unterseer et al. <sup>21</sup> |
|        | B97    | Yes                            | Chia et al. <sup>22</sup>      |
|        | CM105  | Yes                            |                                |
|        | CO125  | Yes                            |                                |
|        | CR1Ht  | Yes                            |                                |
|        | D06    | Yes                            | Unterseer et al. <sup>21</sup> |
|        | D09    | Yes                            | Unterseer et al. <sup>21</sup> |
|        | DJ7    | Yes                            |                                |
|        | EC169  | Yes                            | Unterseer et al. <sup>21</sup> |
|        | F252   | Yes                            | Unterseer et al. <sup>21</sup> |
|        | F288   | Yes                            |                                |
|        | F353   | Yes                            | Unterseer et al. <sup>21</sup> |
|        | F618   | Yes                            | Unterseer et al. <sup>21</sup> |
|        | F748   | Yes                            |                                |
|        | F838   | Yes                            |                                |
|        | F922   | Yes                            |                                |
|        | F98902 | Yes                            | Unterseer et al. <sup>21</sup> |
|        | Fv113  | Yes                            |                                |
|        | Fv230  | Yes                            |                                |
|        | Fv310  | Yes                            |                                |
|        | K55    | Yes                            |                                |
|        | Ky21   | Yes                            | Chia et al. <sup>22</sup>      |
|        | LH119  | Yes                            |                                |
|        | LH132  | Yes                            |                                |
|        | LH149  | Yes                            |                                |
|        | LH160  | Yes                            |                                |
|        | LH202  | Yes                            |                                |
|        | LH38   | Yes                            |                                |
|        | LH39   | Yes                            |                                |
|        | LH51   | Yes                            |                                |
|        | LH54   | Yes                            |                                |
|        | LH59   | Yes                            |                                |
|        | LH61   | Yes                            |                                |
|        | LH65   | Yes                            |                                |
|        | LH74   | Yes                            |                                |
|        | LH93   | Yes                            |                                |
|        | M162W  | Yes                            | Chia et al. <sup>22</sup>      |
| M37W   | Yes    |                                |                                |
| MBS847 | Yes    |                                |                                |
| ML606  | Yes    |                                |                                |
| Mo17   | Yes    | Unterseer et al. <sup>21</sup> |                                |
| Mo18W  | Yes    |                                |                                |
| Ms71   | Yes    | Chia et al. <sup>22</sup>      |                                |
| Oh43   | Yes    | Chia et al. <sup>22</sup>      |                                |
| Oh7B   | Yes    | Chia et al. <sup>22</sup>      |                                |
| PA91   | Yes    |                                |                                |
| PH207  | Yes    | Unterseer et al. <sup>21</sup> |                                |

|       |           |     |                                |
|-------|-----------|-----|--------------------------------|
|       | PHG29     | Yes |                                |
|       | PHG50     | Yes |                                |
|       | PHG72     | Yes |                                |
|       | PHH93     | Yes |                                |
|       | PHJ90     | Yes |                                |
|       | PHK29     | Yes |                                |
|       | PHK42     | Yes |                                |
|       | PHN82     | Yes |                                |
|       | PHP02     | Yes |                                |
|       | PHR25     | Yes |                                |
|       | PHW17     | Yes |                                |
|       | PHW52     | Yes |                                |
|       | UH250     | Yes | Unterseer et al. <sup>21</sup> |
|       | UH304     | Yes | Unterseer et al. <sup>21</sup> |
|       | VA85      | Yes |                                |
|       | W117      | Yes | Unterseer et al. <sup>21</sup> |
|       | W22       | Yes | Chia et al. <sup>22</sup>      |
|       | W401      | Yes |                                |
|       | W64A      | No  | Chia et al. <sup>22</sup>      |
|       | WF9       | Yes |                                |
|       | X740      | Yes |                                |
| Flint | CH10      | Yes | Unterseer et al. <sup>21</sup> |
|       | CO255     | Yes |                                |
|       | D102      | Yes |                                |
|       | D118      | Yes |                                |
|       | D141      | Yes |                                |
|       | D142      | Yes |                                |
|       | D143      | Yes |                                |
|       | D152      | Yes | Unterseer et al. <sup>21</sup> |
|       | D171      | Yes |                                |
|       | D503      | Yes |                                |
|       | DK105     | Yes | Unterseer et al. <sup>21</sup> |
|       | EC49A     | Yes | Unterseer et al. <sup>21</sup> |
|       | EM1349    | Yes |                                |
|       | EP1       | Yes | Unterseer et al. <sup>21</sup> |
|       | EP42      | Yes |                                |
|       | EP44      | Yes | Unterseer et al. <sup>21</sup> |
|       | EZ5       | No  | Unterseer et al. <sup>21</sup> |
|       | F03802    | Yes | Unterseer et al. <sup>21</sup> |
|       | F2        | Yes | Unterseer et al. <sup>21</sup> |
|       | F283      | Yes | Unterseer et al. <sup>21</sup> |
|       | F4        | Yes |                                |
|       | F41       | Yes |                                |
|       | F471      | Yes |                                |
|       | F48       | Yes |                                |
|       | F564      | Yes |                                |
|       | F64       | No  | Unterseer et al. <sup>21</sup> |
|       | F7        | Yes | Unterseer et al. <sup>21</sup> |
|       | F7012     | Yes |                                |
|       | F902      | Yes |                                |
|       | FC13      | Yes |                                |
|       | FC1571    | Yes |                                |
|       | FC23      | Yes |                                |
|       | FC24      | Yes |                                |
|       | FC25      | Yes |                                |
|       | FC26      | Yes |                                |
|       | FF0721H-7 | Yes | Unterseer et al. <sup>21</sup> |



|               |     |                                |
|---------------|-----|--------------------------------|
| FV1           | Yes |                                |
| FV10          | Yes |                                |
| FV11          | Yes |                                |
| FV131         | Yes |                                |
| FV226         | Yes |                                |
| FV268         | Yes |                                |
| FV286         | Yes |                                |
| FV324         | Yes |                                |
| FV65          | Yes |                                |
| FV66          | Yes |                                |
| FV69A         | Yes |                                |
| FV70          | Yes |                                |
| FV79          | Yes |                                |
| FV83          | Yes |                                |
| FV85          | Yes |                                |
| II14H         | Yes | Chia et al. <sup>22</sup>      |
| Lo11          | Yes | Unterseer et al. <sup>21</sup> |
| Lo32          | Yes |                                |
| P39           | Yes | Chia et al. <sup>22</sup>      |
| UH006         | Yes | Unterseer et al. <sup>21</sup> |
| UH007         | Yes | Unterseer et al. <sup>21</sup> |
| UH009         | Yes | Unterseer et al. <sup>21</sup> |
| X1G0895.DH101 | Yes |                                |
| X1G0895.DH104 | Yes |                                |
| X1G0895.DH109 | Yes |                                |
| X1G0896.DH102 | Yes |                                |
| X1G0896.DH116 | Yes |                                |
| X1G0896.DH123 | Yes |                                |
| X1G0896.DH212 | Yes |                                |
| X1G0897.DH102 | Yes |                                |
| X1G0897.DH135 | Yes |                                |
| X1G0897.DH203 | Yes |                                |

---

**Table S2:** Window-based statistics and thresholds according to the selected quantile based on the panel of 136 temperate inbred lines genotyped with the 600 k array.

| <b>Statistic</b>           | <b>Pool</b>    | <b>Sample size</b> | <b>Min.</b> | <b>Median</b> | <b>Mean</b> | <b>Max.</b> | <b>Threshold</b> |
|----------------------------|----------------|--------------------|-------------|---------------|-------------|-------------|------------------|
| Nucleotide diversity $\pi$ | Dent           | 70                 | 0.000       | 0.318         | 0.308       | 0.505       | 0.213            |
|                            | Flint          | 66                 | 0.009       | 0.318         | 0.310       | 0.507       | 0.220            |
| Tajima's $D$               | Dent           | 70                 | -1.070      | 0.780         | 0.730       | 1.775       | 0.202            |
|                            | Flint          | 66                 | -1.070      | 0.723         | 0.682       | 1.769       | 0.169            |
| Composite likelihood ratio | Dent           | 70                 | 0.000       | 0.596         | 4.062       | 474.000     | 6.790            |
|                            | Flint          | 66                 | 0.000       | 0.526         | 6.106       | 598.100     | 6.498            |
| Fixation index $F_{ST}$    | Dent vs. Flint | 136                | -0.014      | 0.125         | 0.144       | 0.804       | 0.261            |

**Table S4:** Gene-wise statistics for all genes and for Dent and Flint candidate genes. Number of genes, mean and median  $F_{ST}$  values (mean  $\pm$  standard error; se) are given. All differences between candidate genes and remaining genes were significant with  $p < 2.2e-16$  determined by two-sided Wilcoxon rank sum tests. Data set G refers to 600 k genotyping data and data set S to whole-genome sequence data.

| Statistic                 | Data set | Pool  | All genes |                     |        | Candidate genes |                     |         |
|---------------------------|----------|-------|-----------|---------------------|--------|-----------------|---------------------|---------|
|                           |          |       | Number    | Mean $\pm$ se       | Median | Number          | Mean $\pm$ se       | Median  |
| Normalized $H$            | G        | Dent  | 16,298    | -0.198 $\pm$ 0.003  | -0.127 | 278             | -0.791 $\pm$ 0.030  | -0.761  |
|                           | G        | Flint | 16,421    | -0.201 $\pm$ 0.003  | -0.135 | 166             | -0.649 $\pm$ 0.034  | -0.659  |
| Nucleotide div. $\pi$     | S        | Dent  | 32,561    | 0.002 $\pm$ 1.0e-05 | 0.002  | 727             | 0.001 $\pm$ 3.9e-05 | 8.6e-04 |
|                           | S        | Flint | 31,971    | 0.002 $\pm$ 9.6e-06 | 0.002  | 403             | 0.001 $\pm$ 5.9e-05 | 8.9e-04 |
| Tajima's $D$              | S        | Dent  | 32,561    | 1.525 $\pm$ 0.006   | 1.640  | 727             | 0.091 $\pm$ 0.041   | -0.072  |
|                           | S        | Flint | 31,971    | 1.151 $\pm$ 0.006   | 1.225  | 403             | 0.168 $\pm$ 0.056   | 0.119   |
| $F_{ST}$ - 5kb upstream   | S        | Dent  | 28,563    | 0.086 $\pm$ 5.7e-04 | 0.063  | 712             | 0.202 $\pm$ 0.006   | 0.160   |
|                           | S        | Flint | 28,898    | 0.087 $\pm$ 5.8e-04 | 0.064  | 377             | 0.203 $\pm$ 0.007   | 0.186   |
| $F_{ST}$ - 500bp upstream | S        | Dent  | 11,257    | 0.083 $\pm$ 0.001   | 0.056  | 282             | 0.219 $\pm$ 0.011   | 0.168   |
|                           | S        | Flint | 11,396    | 0.084 $\pm$ 0.001   | 0.057  | 143             | 0.205 $\pm$ 0.010   | 0.197   |
| $F_{ST}$ - genic regions  | S        | Dent  | 22,230    | 0.080 $\pm$ 6.0e-04 | 0.060  | 526             | 0.204 $\pm$ 0.007   | 0.178   |
|                           | S        | Flint | 22,469    | 0.082 $\pm$ 6.1e-04 | 0.061  | 287             | 0.198 $\pm$ 0.008   | 0.193   |
| $F_{ST}$ - exonic regions | S        | Dent  | 21,764    | 0.078 $\pm$ 6.1e-04 | 0.058  | 400             | 0.212 $\pm$ 0.008   | 0.186   |
|                           | S        | Flint | 21,958    | 0.079 $\pm$ 6.2e-04 | 0.059  | 206             | 0.199 $\pm$ 0.009   | 0.180   |

**Table S7:** Landraces under study with their geographic origins.

| <b>Name</b>               | <b>Abb.<sup>a</sup></b> | <b>Geographic origin<sup>b</sup></b>                   | <b>Source<sup>c</sup></b> | <b>Plants</b> |
|---------------------------|-------------------------|--------------------------------------------------------|---------------------------|---------------|
| Altreier                  | AL                      | Altrei, South Tyrol, IT                                | 1                         | 24            |
| Andoain                   | AN                      | Andoain, Basque Country, ES                            | 2                         | 24            |
| Barisis                   | BA                      | Barisis, Nord-Pas-de-Calais-Picardie, FR               | 3                         | 24            |
| Bugard                    | BU                      | Bugard, Languedoc-Roussillon-Midi-Pyrénées, FR         | 4                         | 22            |
| Castellote                | CA                      | Castellote, Aragon, ES                                 | 2                         | 24            |
| Colmar                    | CO                      | Colmar, Alsace-Champagne-Ardenne-Lorraine, FR          | 3                         | 24            |
| Fleimstal                 | FL                      | Fiemme Valley, South Tyrol, IT                         | 1                         | 24            |
| Gazost                    | GA                      | Gazost, Languedoc-Roussillon-Midi-Pyrénées, FR         | 3                         | 24            |
| Gelber Badischer Landmais | GB                      | Upper Rhine valley, DE                                 | 4                         | 24            |
| Gleisdorfer               | GL                      | Gleisdorf, Styria, AT                                  | 5                         | 24            |
| Kemater Landmais          | KL                      | Kematen, Tyrol, AT                                     | 6                         | 24            |
| Knillis                   | KN                      | Styria, AT                                             | 5                         | 24            |
| Krajova c29               | KR                      | Craiova, Moravské Lieskové, SVK                        | 7                         | 24            |
| Lacaune                   | LC                      | Lacaune, Languedoc-Roussillon-Midi-Pyrénées, FR        | 3                         | 24            |
| Lalin                     | LL                      | Lalín, Galicia, ES                                     | 2                         | 24            |
| Lucq de Bearn             | LD                      | Lucq-de-Béarn, Aquitaine-Limousin-Poitou-Charentes, FR | 3                         | 24            |
| Mahndorfer                | MD                      | Northern Germany, DE                                   | 4                         | 24            |
| Maleksberger              | MB                      | Northern Germany, DE                                   | 8                         | 24            |
| Millette du Lauragais 2   | ML                      | Lauragais, Languedoc-Roussillon-Midi-Pyrénées, FR      | 3                         | 24            |
| Moncassin                 | MO                      | Moncassin, Languedoc-Roussillon-Midi-Pyrénées, FR      | 3                         | 24            |
| Nostrano dell Isola       | ND                      | Northern Italy, IT                                     | 3                         | 24            |
| Oberhuber Martha          | OM                      | Innsbruck, Tyrol, AT                                   | 1                         | 24            |
| Österreichische Landsorte | OE                      | Upper Austria, AT                                      | 9                         | 24            |
| Petkuser Ferdinand Rot    | PE                      | Northeastern Germany, DE                               | 10                        | 24            |
| Pfarrkirchner             | PF                      | Pfarrkirchen, Bavaria, DE                              | 4                         | 24            |
| Polnischer Landmais       | PL                      | Poland, PL                                             | 8                         | 24            |
| Rheintaler Monsheim       | RM                      | Monsheim, Rhineland-Palatinate, DE                     | 8                         | 24            |
| Rheintaler St. Gallen     | RT                      | St. Gallen, St. Gallen, CH                             | 4                         | 24            |
| Rottaler                  | RO                      | Rottal-Inn, Bavaria, DE                                | 3                         | 24            |
| Roux de Chalosse          | RD                      | Chalosse, Aquitaine-Limousin-Poitou-Charentes, FR      | 3                         | 24            |
| Santiago                  | SA                      | Santiago de Compostela, Galicia, ES                    | 2                         | 23            |
| Schindelmeiser            | SC                      | Northeastern Germany, DE                               | 4                         | 23            |
| Sornay                    | SO                      | Sornay, Bourgogne-Franche-Comté, FR                    | 11                        | 23            |
| Strenzfelder              | SF                      | Southeastern Germany, DE                               | 4                         | 23            |
| Tremesino                 | TR                      | Mediterranean ES                                       | 2                         | 24            |
| Tui                       | TU                      | Tui, Galicia, ES                                       | 2                         | 24            |
| Viana                     | VI                      | Viana, Galicia, ES                                     | 2                         | 24            |
| Wantzenau                 | WA                      | La Wantzenau, Alsace-Champagne-Ardenne-Lorraine, FR    | 3                         | 24            |

<sup>a</sup> Abbreviation.

<sup>b</sup> Abbreviations for European countries:

AT: Austria  
CH: Switzerland  
DE: Germany  
ES: Spain  
FR: France  
IT: Italy  
PL: Poland  
SK: Slovakia

<sup>c</sup> The numbers denote the following institutions:

1 Research Centre for Agriculture and Forestry, Laimburg, Italy; obtained via Bavarian State Research Center, Freising, Germany

2 Spanish National Research Council (CSIC), Pontevedra / Zaragoza, Spain

3 Institut National de la Recherche Agronomique (INRA), Centre de Ressources Biologiques, Unité Experimental DiaScope, Mauguio, France

4 Universität Hohenheim, Institute of Plant Breeding, Seed Science and Population Genetics, Stuttgart, Germany

5 Saatzucht Gleisdorf, Gleisdorf, Austria; obtained via Bavarian State Research Center, Freising, Germany

6 Tyrolean Gene Bank, Innsbruck, Austria; obtained via Bavarian State Research Center, Freising, Germany

7 Crop Research Institute, Prague, Czech Republic; obtained via Bavarian State Research Center, Freising, Germany

8 Dow Agro Science LLC, München, Germany; obtained via Bavarian State Research Center, Freising, Germany

9 Bavarian State Research Center, Freising, Germany

10 Leibniz Institute of Plant Genetics and Crop Plant Research, Gatersleben, Germany; obtained via Bavarian State Research Center, Freising, Germany

11 Centre for Genetic Resources, Wageningen, Netherlands; obtained via Bavarian State Research Center, Freising, Germany
